# Supplementary material for: Defying Limits: Fluoroscopy-Only Transcatheter Tricuspid Valve-in-Valve for Severe Bioprosthetic Stenosis in a Complex Case of Cirrhosis: A Case Report
Source: Research Square preprint supplement (doi:10.21203/rs.3.rs-6310439/v1), 2025-05-06
Supplement: Supplementary file 1 [file caption of video.docx]

**Video 1. Positioning of the MyVal prosthesis in relation to the surgical Carpentier-Edwards bioprosthesis and Slow and controlled inflation of the MyVal valve with the balloon in two consecutive stages.**

**"This video can be placed instead of Figures 1 and 2 in the text.”**

**Video 2. Final valve positioning of the MyVal prosthesis**
